# Supplementary material
Source: PubMed Central journal article supplement (PMC9735246)
Supplement: NIHMS1851200-supplement-Table_S1.pdf [file NIHMS1851200-supplement-Table_S1.pdf]

## Supplemental Information

**Table S1. CryoEM image collection, map reconstruction, and model refinement**

|                                                                        | Apo-TRiC  | PFD- $\beta$ Tub-TRiC  | TRiC- $\beta$ Tub State I                                                      | TRiC- $\beta$ Tub State II                                                     | TRiC- $\beta$ Tub State III                                                    | TRiC- $\beta$ Tub State IV                                                     |
|------------------------------------------------------------------------|-----------|------------------------|--------------------------------------------------------------------------------|--------------------------------------------------------------------------------|--------------------------------------------------------------------------------|--------------------------------------------------------------------------------|
| <b>CryoEM image collection and map processing</b>                      |           |                        |                                                                                |                                                                                |                                                                                |                                                                                |
| Voltage (kV)                                                           | 300       | 300                    | 300                                                                            | 300                                                                            | 300                                                                            | 300                                                                            |
| Total electron exposure (e <sup>-</sup> /Å <sup>2</sup> )              | 37        | 36                     | 37                                                                             | 37                                                                             | 37                                                                             | 37                                                                             |
| Defocus range (μm)                                                     | -0.5~-2.5 | -0.5~-3.5              | -0.5~-3.5                                                                      | -0.5~-3.5                                                                      | -0.5~-3.5                                                                      | -0.5~-3.5                                                                      |
| Pixel size (Å)                                                         | 1.0       | 1.02                   | 1.1                                                                            | 1.1                                                                            | 1.1                                                                            | 1.1                                                                            |
| Symmetry imposed                                                       | C1        | C1                     | C1                                                                             | C1                                                                             | C1                                                                             | C1                                                                             |
| Particle images (no.)                                                  | 662,744   | 194,013                | 110,984                                                                        | 42,804                                                                         | 94,955                                                                         | 24,233                                                                         |
| Map resolution (Å)<br>FSC threshold (0.143)                            | 3.1       | 3.9                    | 3.0                                                                            | 3.3                                                                            | 2.9                                                                            | 3.6                                                                            |
| EMDB ID                                                                | 32822     | 32823                  | 26089                                                                          | 26120                                                                          | 26123                                                                          | 26131                                                                          |
| <b>Model refinement</b>                                                |           |                        |                                                                                |                                                                                |                                                                                |                                                                                |
| Initial model used (PDB code)                                          | NA        | 6NR8                   | 7LUM, 6I2I                                                                     | 7LUM, 6I2I                                                                     | 7LUM, 6I2I                                                                     | 7LUM, 6I2I                                                                     |
| Model composition<br>Non-hydrogen atoms<br>Protein residues<br>Ligands |           | 67039<br>8727<br>ADP:4 | 33714<br>4377<br>MG: 8<br>ADP: 8<br>AF <sub>3</sub> : 8<br>H <sub>2</sub> O: 8 | 34563<br>4481<br>MG: 8<br>ADP: 8<br>AF <sub>3</sub> : 8<br>H <sub>2</sub> O: 8 | 35180<br>4561<br>MG: 8<br>ADP: 8<br>AF <sub>3</sub> : 8<br>H <sub>2</sub> O: 8 | 35877<br>4650<br>MG: 8<br>ADP: 8<br>AF <sub>3</sub> : 8<br>H <sub>2</sub> O: 8 |
| R.m.s. deviations<br>Bond lengths (Å)<br>Bond angles (°)               |           | 0.003<br>0.790         | 0.014<br>1.137                                                                 | 0.012<br>1.233                                                                 | 0.010<br>1.049                                                                 | 0.006<br>0.767                                                                 |
| Validation<br>MolProbity score<br>Clashscore<br>Rotamer outliers (%)   |           | 2.12<br>18.09<br>0.08  | 1.6<br>4.7<br>0.08                                                             | 1.61<br>4.54<br>0.32                                                           | 1.57<br>4.52<br>0.00                                                           | 1.65<br>6.22<br>0.13                                                           |
| Ramachandran plot<br>Favored (%)<br>Allowed (%)<br>Outliers (%)        |           | 94.66<br>5.25<br>0.09  | 94.83<br>5.03<br>0.14                                                          | 94.39<br>5.45<br>0.16                                                          | 95.02<br>4.78<br>0.20                                                          | 95.62<br>4.30<br>0.09                                                          |
| PDB ID                                                                 |           | 7WU7                   | 7TRG                                                                           | 7TTN                                                                           | 7TTT                                                                           | 7TUB                                                                           |
